# Supplementary material for: Dropout and Abstinence Outcomes in a National Text Messaging Smoking Cessation Intervention for Pregnant Women, SmokefreeMOM: Observational Study
Source: PubMed Central journal article supplement (PMC6803886; doi:10.2196/14699), 2019-10-07
Supplement: mhealth_v7i10e14699_app1.pdf [file mhealth_v7i10e14699_app1.pdf]

Multimedia Appendix 1. SFMom user characteristics, complete case data.

|                                                           | <b>Total</b> |                              | <b>Non-completers<sup>a</sup></b> |                              | <b>Completers<sup>b</sup></b> |                              |
|-----------------------------------------------------------|--------------|------------------------------|-----------------------------------|------------------------------|-------------------------------|------------------------------|
|                                                           | <b>N</b>     | <b>Summary<br/>Statistic</b> | <b>N</b>                          | <b>Summary<br/>Statistic</b> | <b>N</b>                      | <b>Summary<br/>Statistic</b> |
| <b>Age</b>                                                |              |                              |                                   |                              |                               |                              |
| Mean (SD)                                                 | 1288         | 29.58 (7.64)                 | 715                               | 29.64 (7.68)                 | 573                           | 29.49 (7.60)                 |
| 5% Trimmed Mean (SD)                                      | 1158         | 29.02 (6.35)                 | 643                               | 29.09 (6.33)                 | 515                           | 28.93 (6.38)                 |
| Range                                                     | 1288         | 14 - 99                      | 715                               | 16 - 99                      | 573                           | 14 - 72                      |
| Median (IQR)                                              | 1288         | 29.00 (10.00)                | 715                               | 29.00 (10.00)                | 573                           | 28.00 (10.00)                |
| <b>Age (Winsorized)</b>                                   |              |                              |                                   |                              |                               |                              |
| Mean (SD)                                                 | 1288         | 29.46 (7.11)                 | 715                               | 29.52 (7.05)                 | 573                           | 29.39 (7.19)                 |
| 5% Trimmed Mean (SD)                                      | 1158         | 29.02 (6.35)                 | 643                               | 29.09 (6.33)                 | 515                           | 28.93 (6.38)                 |
| Range                                                     | 1288         | 14 - 54                      | 715                               | 16 - 54                      | 573                           | 14 - 54                      |
| Median (IQR)                                              | 1288         | 29.00 (10.00)                | 715                               | 29.00 (10.00)                | 573                           | 28.00 (10.00)                |
| <b>Race/Ethnicity, %</b>                                  |              |                              |                                   |                              |                               |                              |
| White                                                     | 817          | 63.43                        | 484                               | 67.69                        | 333                           | 58.12                        |
| Black                                                     | 191          | 14.83                        | 78                                | 10.91                        | 113                           | 19.72                        |
| Latina                                                    | 109          | 8.46                         | 66                                | 9.23                         | 43                            | 7.50                         |
| Multiracial, Asian,<br>AI/AN,<br>NHPI, Other <sup>c</sup> | 113          | 8.77                         | 56                                | 7.83                         | 57                            | 9.95                         |
| Missing                                                   | 58           | 4.50                         | 31                                | 4.34                         | 27                            | 4.71                         |
| <b>Education, %</b>                                       |              |                              |                                   |                              |                               |                              |
| High school or less                                       | 385          | 29.89                        | 201                               | 28.11                        | 184                           | 32.11                        |
| Some college                                              | 415          | 32.22                        | 231                               | 32.31                        | 184                           | 32.11                        |
| College graduate or<br>above                              | 168          | 13.04                        | 117                               | 16.36                        | 51                            | 8.90                         |
| Missing                                                   | 320          | 24.84                        | 166                               | 23.22                        | 154                           | 26.88                        |
| <b>Region,<sup>d</sup> %</b>                              |              |                              |                                   |                              |                               |                              |
| Northeast                                                 | 178          | 13.82                        | 105                               | 14.69                        | 73                            | 12.74                        |
| Midwest                                                   | 329          | 25.54                        | 200                               | 27.97                        | 129                           | 22.51                        |
| South                                                     | 565          | 43.87                        | 293                               | 40.98                        | 272                           | 47.47                        |
| West                                                      | 206          | 15.99                        | 116                               | 16.22                        | 90                            | 15.71                        |
| Missing                                                   | 10           | 0.78                         | 1                                 | 0.14                         | 9                             | 1.57                         |
| <b>Smoking frequency, %</b>                               |              |                              |                                   |                              |                               |                              |
| Non-daily                                                 | 141          | 10.95                        | 66                                | 9.23                         | 75                            | 13.09                        |
| Daily                                                     | 1130         | 87.73                        | 639                               | 89.37                        | 491                           | 85.69                        |
| Missing                                                   | 17           | 1.32                         | 10                                | 1.40                         | 7                             | 1.22                         |
| <b>Cigarettes per day, %</b>                              |              |                              |                                   |                              |                               |                              |
| Light (<10 cigarettes)                                    | 756          | 58.70                        | 394                               | 55.10                        | 362                           | 63.18                        |
| Moderate (11-19<br>cigarettes)                            | 412          | 31.99                        | 238                               | 33.29                        | 174                           | 30.37                        |
| Heavy (≥20 cigarettes)                                    | 110          | 8.54                         | 77                                | 10.77                        | 33                            | 5.76                         |
| Missing                                                   | 10           | 0.78                         | 6                                 | 0.84                         | 4                             | 0.70                         |
| <b>Web-enabled phone,<br/>%</b>                           |              |                              |                                   |                              |                               |                              |
| Yes                                                       | 1238         | 96.12                        | 687                               | 96.08                        | 551                           | 96.16                        |
| No                                                        | 50           | 3.88                         | 28                                | 3.92                         | 22                            | 3.84                         |

|                                                      |      |                 |     |                 |     |                 |
|------------------------------------------------------|------|-----------------|-----|-----------------|-----|-----------------|
| <b>Time of dropout,<sup>e</sup> %</b>                |      |                 |     |                 |     |                 |
| Prior to quit date                                   | 206  | 15.99           | 206 | 28.81           | N/A | N/A             |
| On or after quit date                                | 509  | 39.52           | 509 | 71.19           | N/A | N/A             |
| <b>Time from signup date to due date<sup>f</sup></b> |      |                 |     |                 |     |                 |
| Mean (SD)                                            | 1288 | 161.21 (73.65)  | 715 | 164.73 (75.57)  | 573 | 156.82 (71.01)  |
| 5% Trimmed Mean (SD)                                 | 1158 | 164.49 (75.93)  | 643 | 168.45 (78.25)  | 515 | 159.47 (72.34)  |
| Range                                                | 1288 | 0 - 279         | 715 | 0 - 279         | 573 | 0 - 279         |
| Median (IQR)                                         | 1288 | 175.50 (117.00) | 715 | 184.00 (113.00) | 573 | 167.00 (113.00) |
| <b>Time from signup to quit date<sup>f</sup></b>     |      |                 |     |                 |     |                 |
| Mean (SD)                                            | 1288 | 10.41 (15.74)   | 715 | 9.38 (14.06)    | 573 | 11.70 (17.53)   |
| 5% Trimmed Mean (SD)                                 | 1158 | 8.04 (9.60)     | 643 | 7.58 (7.65)     | 515 | 8.93 (12.65)    |
| Range                                                | 1288 | 0 - 197         | 715 | 0 - 197         | 573 | 0 - 144         |
| Median (IQR)                                         | 1288 | 7.00 (13.00)    | 715 | 7.00 (13.00)    | 573 | 7.00 (13.00)    |
| <b>Prequit time<sup>f</sup></b>                      |      |                 |     |                 |     |                 |
| Mean (SD)                                            | 1288 | 6.12 (5.53)     | 715 | 5.20 (5.29)     | 573 | 7.28 (5.61)     |
| 5% Trimmed Mean (SD)                                 | 1158 | 6.03 (5.83)     | 643 | 5.00 (5.58)     | 515 | 7.31 (5.91)     |
| Range                                                | 1288 | 0 - 14          | 715 | 0 - 14          | 573 | 0 - 14          |
| Median (IQR)                                         | 1288 | 5.00 (12.00)    | 715 | 3.00 (10.00)    | 573 | 7.00 (13.00)    |
| <b>Time from quit day to dropout<sup>f,g</sup></b>   |      |                 |     |                 |     |                 |
| Mean (SD)                                            | 509  | 10.70 (11.74)   | 509 | 10.70 (11.74)   | N/A | N/A             |
| 5% Trimmed Mean (SD)                                 | 457  | 9.67 (11.92)    | 457 | 9.67 (11.92)    | N/A | N/A             |
| Range                                                | 509  | 0 - 42          | 509 | 0 - 42          | N/A | N/A             |
| Median (IQR)                                         | 509  | 6.00 (16.00)    | 509 | 6.00 (16.00)    | N/A | N/A             |

<sup>a</sup>Non-completers are users who opted out of the intervention any time on or between day -14 (14 days before quit date) and intervention end (day 42)

<sup>b</sup>Completers are users who remained in SFMom until after intervention end

<sup>c</sup>Complete case sample was 4.72% (58/1230) multiracial, 1.14% (14/1230) Asian, 0.73% (9/1230) AI/AN, 0.49% (6/1230) NHPI, and 2.11% (26/1230) other

<sup>d</sup>Users provided their zip codes, which were automatically converted into US state. We categorized states into US Census Bureau region. One user who lived in Puerto Rico, for which there is no census region, was categorized into South to retain her data in analyses

<sup>e</sup>Remaining 44.49% (573/1288) did not drop out prior to intervention end

<sup>f</sup>All time variables are reported in number of days

<sup>g</sup>Among those who made it to their quit date
