# Supplementary material for: Dropout and Abstinence Outcomes in a National Text Messaging Smoking Cessation Intervention for Pregnant Women, SmokefreeMOM: Observational Study
Source: PubMed Central journal article supplement (PMC6803886; doi:10.2196/14699), 2019-10-07
Supplement: mhealth_v7i10e14699_app2.pdf [file mhealth_v7i10e14699_app2.pdf]

Multimedia Appendix 2. Association between user characteristics and dropout ( $n = 1288$ )

| <b>Characteristic</b>                           | <b>Adjusted Odds Ratio</b> | <b>95% CI</b> | <b>p-value</b> |
|-------------------------------------------------|----------------------------|---------------|----------------|
| Age (Winsorized)                                | 0.99                       | 0.97 - 1.01   | .29            |
| <b>Race/Ethnicity</b> (ref: White)              |                            |               |                |
| Black                                           | 0.63                       | 0.45 - 0.88   | .007           |
| Latina                                          | 0.91                       | 0.60 - 1.40   | .68            |
| Multiracial, Asian, AI/AN, NHPI, other          | 0.69                       | 0.46 - 1.03   | .07            |
| <b>Education</b> (ref: $\geq$ College graduate) |                            |               |                |
| $\leq$ High school                              | 0.53                       | 0.35 - 0.81   | .003           |
| Some college                                    | 0.62                       | 0.42 - 0.91   | .02            |
| <b>Region</b> (ref: South)                      |                            |               |                |
| Northeast                                       | 1.25                       | 0.87 - 1.78   | .23            |
| Midwest                                         | 1.34                       | 1.00 - 1.78   | .048           |
| West                                            | 1.13                       | 0.81 - 1.60   | .47            |
| <b>Cigarettes per day</b> (ref: Light)          |                            |               |                |
| Moderate                                        | 1.11                       | 0.85 - 1.45   | .44            |
| Heavy                                           | 1.83                       | 1.16 - 2.89   | .01            |
| <b>Smoking frequency</b> (ref: Non-daily)       |                            |               |                |
| Daily                                           | 1.41                       | 0.97 - 2.06   | .07            |
| Prequit time                                    | 0.93                       | 0.91 - 0.95   | <.001          |

*Note:* Users who dropped out in the prequit period, on quit day, or on/before day 42 were considered dropouts in this analysis. All those who remained in the program past day 42 were considered to have completed the program.
