# Supplementary material for: Dropout and Abstinence Outcomes in a National Text Messaging Smoking Cessation Intervention for Pregnant Women, SmokefreeMOM: Observational Study
Source: PubMed Central journal article supplement (PMC6803886; doi:10.2196/14699), 2019-10-07
Supplement: mhealth_v7i10e14699_app3.pdf [file mhealth_v7i10e14699_app3.pdf]

Multimedia Appendix 3. Response and abstinence rates by race/ethnicity, imputed data.

|                                           | <b>Total<sup>a</sup></b> | <b>Abstinent</b> | <b>Not<br/>Abstinent</b> | <b>No<br/>Response</b> | <b>Response<br/>Rate<sup>b</sup></b> | <b>Abstinence<br/>Point<br/>Prevalence<sup>c</sup></b> |
|-------------------------------------------|--------------------------|------------------|--------------------------|------------------------|--------------------------------------|--------------------------------------------------------|
|                                           | <i>N</i>                 | <i>N</i>         | <i>N</i>                 | <i>N</i>               | %                                    | %                                                      |
| <b>Quit Date</b>                          |                          |                  |                          |                        |                                      |                                                        |
| Overall                                   | 1,082                    | 157              | 162                      | 763                    | 29.48                                | 14.51                                                  |
| White                                     | 709                      | 101              | 118                      | 491                    | 30.76                                | 14.18                                                  |
| Black                                     | 181                      | 31               | 23                       | 127                    | 29.97                                | 17.15                                                  |
| Latina                                    | 91                       | 11               | 8                        | 73                     | 20.41                                | 11.57                                                  |
| Multiracial, Asian,<br>AI/AN, NHPI, Other | 100                      | 15               | 13                       | 72                     | 27.85                                | 14.75                                                  |
| <b>7-days post-quit</b>                   |                          |                  |                          |                        |                                      |                                                        |
| Overall                                   | 813                      | 70               | 80                       | 663                    | 18.45                                | 6.47                                                   |
| White                                     | 519                      | 43               | 60                       | 416                    | 19.81                                | 6.04                                                   |
| Black                                     | 151                      | 13               | 10                       | 128                    | 15.15                                | 7.17                                                   |
| Latina                                    | 60                       | 5                | 3                        | 52                     | 13.88                                | 5.65                                                   |
| Multiracial, Asian,<br>AI/AN, NHPI, Other | 83                       | 9                | 7                        | 67                     | 19.24                                | 8.97                                                   |
| <b>14-days post-quit</b>                  |                          |                  |                          |                        |                                      |                                                        |
| Overall                                   | 727                      | 67               | 65                       | 595                    | 18.16                                | 6.19                                                   |
| White                                     | 453                      | 42               | 41                       | 371                    | 18.21                                | 5.92                                                   |
| Black                                     | 144                      | 14               | 7                        | 123                    | 14.73                                | 7.72                                                   |
| Latina                                    | 55                       | 5                | 5                        | 44                     | 18.68                                | 5.54                                                   |
| Multiracial, Asian,<br>AI/AN, NHPI, Other | 75                       | 6                | 12                       | 57                     | 24.02                                | 5.98                                                   |
| <b>21-days post-quit</b>                  |                          |                  |                          |                        |                                      |                                                        |
| Overall                                   | 678                      | 54               | 51                       | 573                    | 15.49                                | 4.99                                                   |
| White                                     | 421                      | 36               | 34                       | 351                    | 16.60                                | 5.08                                                   |
| Black                                     | 136                      | 13               | 9                        | 114                    | 16.16                                | 7.17                                                   |
| Latina                                    | 52                       | 1                | 2                        | 49                     | 5.83                                 | 1.10                                                   |
| Multiracial, Asian,<br>AI/AN, NHPI, Other | 68                       | 4                | 6                        | 58                     | 14.67                                | 3.99                                                   |
| <b>28-days post-quit</b>                  |                          |                  |                          |                        |                                      |                                                        |
| Overall                                   | 642                      | 59               | 20                       | 563                    | 12.31                                | 5.45                                                   |

|                                           |     |    |    |     |       |      |
|-------------------------------------------|-----|----|----|-----|-------|------|
| White                                     | 396 | 33 | 16 | 347 | 12.35 | 4.65 |
| Black                                     | 131 | 15 | 3  | 113 | 13.73 | 8.27 |
| Latina                                    | 49  | 4  | 0  | 45  | 8.21  | 4.39 |
| Multiracial, Asian,<br>AI/AN, NHPI, Other | 65  | 7  | 1  | 57  | 12.28 | 6.98 |

### 35-days post-quit

|                                           |     |    |    |     |       |      |
|-------------------------------------------|-----|----|----|-----|-------|------|
| Overall                                   | 606 | 39 | 23 | 544 | 10.23 | 3.60 |
| White                                     | 370 | 30 | 17 | 323 | 12.69 | 4.23 |
| Black                                     | 125 | 5  | 1  | 119 | 4.80  | 2.76 |
| Latina                                    | 48  | 2  | 1  | 45  | 6.20  | 2.19 |
| Multiracial, Asian,<br>AI/AN, NHPI, Other | 62  | 2  | 4  | 56  | 9.65  | 1.99 |

### 42-days post-quit

|                                           |     |    |    |     |       |      |
|-------------------------------------------|-----|----|----|-----|-------|------|
| Overall                                   | 578 | 38 | 19 | 521 | 9.86  | 3.51 |
| White                                     | 353 | 25 | 12 | 316 | 10.49 | 3.53 |
| Black                                     | 119 | 6  | 3  | 110 | 7.56  | 3.31 |
| Latina                                    | 46  | 2  | 2  | 42  | 8.64  | 2.19 |
| Multiracial, Asian,<br>AI/AN, NHPI, Other | 60  | 5  | 2  | 53  | 11.66 | 4.98 |

### 72-days post-quit

|                                           |     |    |    |     |      |      |
|-------------------------------------------|-----|----|----|-----|------|------|
| Overall                                   | 535 | 21 | 12 | 502 | 6.17 | 1.99 |
| White                                     | 327 | 14 | 6  | 307 | 6.12 | 2.02 |
| Black                                     | 108 | 3  | 2  | 103 | 4.63 | 1.73 |
| Latina                                    | 44  | 2  | 1  | 41  | 6.83 | 2.30 |
| Multiracial, Asian,<br>AI/AN, NHPI, Other | 56  | 2  | 3  | 51  | 8.87 | 2.04 |

<sup>a</sup>Total *N* reflects imputed data and is 1/20<sup>th</sup> of a subject rounded to the nearest integer.

<sup>b</sup>Response rate =  $((N \text{ Abstinent} + N \text{ Not Abstinent}) / \text{Total } N) \times 100$

<sup>c</sup>Point prevalence =  $(\text{Abstinent} / N \text{ for point prevalence}) \times 100$ . *N* for point prevalence calculations from quit day to day 42 are: 1,082 (overall), 709 (White), 181 (Black), 91 (Latina), 100 (Multiracial, Asian, AI/AN, NHPI, Other); *N* for point prevalence calculations at day 72 are: 1,053 (overall), 694 (White), 173 (Black), 87 (Latina), 98 (Multiracial, Asian, AI/AN, NHPI, Other)
