# Supplementary material for: Dropout and Abstinence Outcomes in a National Text Messaging Smoking Cessation Intervention for Pregnant Women, SmokefreeMOM: Observational Study
Source: PubMed Central journal article supplement (PMC6803886; doi:10.2196/14699), 2019-10-07
Supplement: mhealth_v7i10e14699_app4.pdf [file mhealth_v7i10e14699_app4.pdf]

Multimedia Appendix 4. Associations between user characteristics and response and abstinence rates, complete case analysis.

| Characteristic                            | Response Rate <sup>a</sup> |                                 |                            |                           |
|-------------------------------------------|----------------------------|---------------------------------|----------------------------|---------------------------|
|                                           | Quit Date<br>n = 753       | Day 7<br>n = 551                | Day 14<br>n = 496          | Day 21<br>n = 463         |
|                                           | aOR (95% CI)<br>(p-value)  | aOR (95% CI)<br>(p-value)       | aOR (95% CI)<br>(p-value)  | aOR (95% CI)<br>(p-value) |
| Age (Winsorized)                          | 0.98 (0.96-1.01)<br>(.20)  | 0.97 (0.93-1.01)<br>(.14)       | 0.99 (0.95-1.03)<br>(.64)  | 1.01 (0.97-1.05)<br>(.56) |
| <b>Race/Ethnicity</b> (Ref: White)        |                            |                                 |                            |                           |
| Black                                     | 0.89 (0.56-1.42)<br>(.62)  | 0.74 (0.39-1.44)<br>(.38)       | 0.65 (0.31-1.34)<br>(.24)  | 1.12 (0.56-2.22)<br>(.75) |
| Latina                                    | 0.40 (0.19-0.86)<br>(.02)  | 0.40 (0.13-1.24)<br>(.11)       | 1.35 (0.49-3.68)<br>(.56)  | 0.36 (0.08-1.67)<br>(.19) |
| Multiracial, Asian, AI/AN, NHPI, Other    | 0.83 (0.45-1.53)<br>(.56)  | 0.75 (0.34-1.67)<br>(.48)       | 0.89 (0.36-2.20)<br>(.81)  | 0.82 (0.29-2.33)<br>(.71) |
| <b>Education</b> (Ref: ≥college degree)   |                            |                                 |                            |                           |
| ≤High school                              | 0.52 (0.32-0.85)<br>(.01)  | 0.18 (0.09-0.36)<br>( $<.001$ ) | 0.40 (0.18-0.88)<br>(.02)  | 0.63 (0.24-1.66)<br>(.35) |
| Some college                              | 0.93 (0.59-1.47)<br>(.76)  | 0.54 (0.30-0.95)<br>(.03)       | 1.19 (0.59-2.38)<br>(.62)  | 1.69 (0.72-3.98)<br>(.23) |
| <b>Region</b> (ref: South)                |                            |                                 |                            |                           |
| Northeast                                 | 1.17 (0.71-1.93)<br>(.55)  | 1.89 (0.98-3.62)<br>(.06)       | 1.44 (0.70-2.98)<br>(.32)  | 2.00 (0.92-4.36)<br>(.08) |
| Midwest                                   | 1.04 (0.70-1.55)<br>(.84)  | 1.22 (0.69-2.16)<br>(.49)       | 1.34 (0.72-2.50)<br>(.36)  | 1.98 (1.06-3.71)<br>(.03) |
| West                                      | 1.01 (0.63-1.62)<br>(.95)  | 1.28 (0.67-2.47)<br>(.45)       | 1.04 (0.48-2.25)<br>(.93)  | 0.57 (0.20-1.60)<br>(.28) |
| <b>Cigarettes per day</b> (Ref: Light)    |                            |                                 |                            |                           |
| Moderate                                  | 1.17 (0.81-1.68)<br>(.40)  | 0.88 (0.53-1.47)<br>(.62)       | 1.07 (0.60-1.91)<br>(.83)  | 0.60 (0.32-1.14)<br>(.12) |
| Heavy                                     | 1.59 (0.81-3.12)<br>(.18)  | 1.25 (0.39-4.06)<br>(.71)       | 2.92 (0.99-8.61)<br>(.052) | 3.16 (0.96-10.4)<br>(.06) |
| <b>Smoking Frequency</b> (Ref: Non-daily) |                            |                                 |                            |                           |
| Daily                                     | 0.78 (0.46-1.30)<br>(.34)  | 0.84 (0.43-1.63)<br>(.61)       | 0.46 (0.23-0.92)<br>(.03)  | 1.37 (0.57-3.28)<br>(.48) |
| Pre-quit time                             | 1.02 (0.99-1.05)<br>(.20)  | 0.99 (0.95-1.03)<br>(.76)       | 1.03 (0.99-1.08)<br>(.14)  | 1.01 (0.96-1.06)<br>(.76) |

Multimedia Appendix 4. Associations between user characteristics and response rates and abstinence (complete case analysis), continued

|                                           | <b>Day 28</b>             | <b>Day 35</b>             | <b>Day 42</b>             | <b>Day 72</b>             |
|-------------------------------------------|---------------------------|---------------------------|---------------------------|---------------------------|
|                                           | <b>n = 437</b>            | <b>n = 409</b>            | <b>n = 392</b>            | <b>n = 361</b>            |
| Characteristic                            | aOR (95% CI)<br>(p-value) | aOR (95% CI)<br>(p-value) | aOR (95% CI)<br>(p-value) | aOR (95% CI)<br>(p-value) |
| Age (Winsorized)                          | 0.99 (0.94-1.04)<br>(.69) | 1.01 (0.96-1.06)<br>(.74) | 1.00 (0.96-1.05)<br>(.92) | 0.99 (0.91-1.07)<br>(.74) |
| <b>Race/Ethnicity</b> (Ref: White)        |                           |                           |                           |                           |
| Black                                     | 1.11 (0.51-2.42)<br>(.79) | 0.25 (0.08-0.76)<br>(.01) | 0.55 (0.21-1.47)<br>(.23) | 0.76 (0.18-3.15)<br>(.70) |
| Latina                                    | 0.58 (0.12-2.72)<br>(.49) | 0.53 (0.11-2.51)<br>(.42) | 1.18 (0.30-4.58)<br>(.81) | 0.60 (0.07-5.53)<br>(.65) |
| Multiracial, Asian, AI/AN, NHPI, Other    | 0.85 (0.27-2.66)<br>(.78) | 0.60 (0.16-2.17)<br>(.43) | 1.09 (0.34-3.52)<br>(.89) | 1.83 (0.43-7.74)<br>(.41) |
| <b>Education</b> (Ref: ≥college degree)   |                           |                           |                           |                           |
| ≤High school                              | 0.40 (0.14-1.13)<br>(.08) | 0.81 (0.26-2.46)<br>(.70) | 0.60 (0.20-1.86)<br>(.38) | 0.47 (0.09-2.43)<br>(.37) |
| Some college                              | 1.22 (0.50-2.99)<br>(.66) | 2.19 (0.81-5.92)<br>(.12) | 1.53 (0.56-4.16)<br>(.41) | 1.05 (0.25-4.41)<br>(.94) |
| <b>Region</b> (ref: South)                |                           |                           |                           |                           |
| Northeast                                 | 1.18 (0.50-2.81)<br>(.71) | 1.04 (0.40-2.68)<br>(.94) | 1.16 (0.43-3.13)<br>(.76) | 1.45 (0.37-5.59)<br>(.59) |
| Midwest                                   | 0.54 (0.24-1.23)<br>(.14) | 0.88 (0.40-1.94)<br>(.75) | 1.41 (0.65-3.07)<br>(.39) | 0.73 (0.18-2.90)<br>(.65) |
| West                                      | 0.67 (0.25-1.78)<br>(.42) | 0.64 (0.22-1.88)<br>(.42) | 0.45 (0.12-1.64)<br>(.22) | 1.09 (0.25-4.79)<br>(.91) |
| <b>Cigarettes per day</b> (Ref: Light)    |                           |                           |                           |                           |
| Moderate                                  | 0.75 (0.37-1.53)<br>(.42) | 1.21 (0.59-2.46)<br>(.61) | 0.90 (0.41-1.97)<br>(.79) | 1.12 (0.34-3.69)<br>(.85) |
| Heavy                                     | 2.47 (0.60-10.2)<br>(.21) | 1.38 (0.27-7.12)<br>(.70) | 2.37 (0.56-9.97)<br>(.24) | 2.64 (0.27-25.8)<br>(.40) |
| <b>Smoking Frequency</b> (Ref: Non-daily) |                           |                           |                           |                           |
| Daily                                     | 1.02 (0.41-2.50)<br>(.97) | 0.37 (0.16-0.86)<br>(.02) | 0.54 (0.22-1.33)<br>(.18) | 0.26 (0.09-0.79)<br>(.02) |
| Pre-quit time                             | 1.02 (0.97-1.08)<br>(.40) | 1.02 (0.96-1.08)<br>(.58) | 1.03 (0.97-1.09)<br>(.39) | 0.96 (0.88-1.05)<br>(.35) |

Multimedia Appendix 4. Associations between user characteristics and response rates and abstinence (complete case analysis), continued

| Characteristic                            | <b>Abstinence (intent-to-treat)<sup>b</sup></b> |                            |                           |                           |
|-------------------------------------------|-------------------------------------------------|----------------------------|---------------------------|---------------------------|
|                                           | <b>Quit Date</b>                                | <b>Day 7</b>               | <b>Day 14</b>             | <b>Day 21</b>             |
|                                           | <b>n = 753</b>                                  | <b>n = 753</b>             | <b>n = 753</b>            | <b>n = 753</b>            |
|                                           | aOR (95% CI)<br>(p-value)                       | aOR (95% CI)<br>(p-value)  | aOR (95% CI)<br>(p-value) | aOR (95% CI)<br>(p-value) |
| Age (Winsorized)                          | 1.00 (0.96-1.03)<br>(.81)                       | 0.98 (0.93-1.04)<br>(.54)  | 1.01 (0.96-1.06)<br>(.74) | 0.99 (0.94-1.05)<br>(.81) |
| <b>Race/Ethnicity</b> (Ref: White)        |                                                 |                            |                           |                           |
| Black                                     | 1.19 (0.67-2.11)<br>(.54)                       | 0.97 (0.41-2.30)<br>(.95)  | 0.79 (0.33-1.90)<br>(.60) | 1.12 (0.44-2.83)<br>(.81) |
| Latina                                    | 0.39 (0.14-1.14)<br>(.09)                       | 0.42 (0.09-1.85)<br>(.25)  | 0.56 (0.13-2.47)<br>(.44) | Undefined <sup>c</sup>    |
| Multiracial, Asian, AI/AN, NHPI, Other    | 0.83 (0.37-1.85)<br>(.64)                       | 0.85 (0.28-2.55)<br>(.77)  | 0.47 (0.11-2.05)<br>(.31) | 0.32 (0.04-2.50)<br>(.28) |
| <b>Education</b> (Ref: ≥college degree)   |                                                 |                            |                           |                           |
| ≤High school                              | 0.42 (0.22-0.78)<br>(.007)                      | 0.23 (0.08-0.61)<br>(.003) | 0.43 (0.16-1.13)<br>(.09) | 0.87 (0.24-3.12)<br>(.83) |
| Some college                              | 0.84 (0.48-1.46)<br>(.53)                       | 0.71 (0.33-1.50)<br>(.37)  | 0.98 (0.43-2.22)<br>(.96) | 1.55 (0.50-4.82)<br>(.45) |
| <b>Region</b> (ref: South)                |                                                 |                            |                           |                           |
| Northeast                                 | 0.90 (0.46-1.74)<br>(.75)                       | 1.12 (0.47-2.67)<br>(.79)  | 0.98 (0.39-2.46)<br>(.97) | 2.19 (0.86-5.60)<br>(.10) |
| Midwest                                   | 0.92 (0.55-1.54)<br>(.75)                       | 0.42 (0.17-1.06)<br>(.07)  | 0.77 (0.35-1.70)<br>(.52) | 0.99 (0.42-2.33)<br>(.97) |
| West                                      | 0.93 (0.50-1.71)<br>(.81)                       | 1.18 (0.53-2.64)<br>(.68)  | 0.60 (0.22-1.66)<br>(.32) | 0.20 (0.03-1.54)<br>(.12) |
| <b>Cigarettes per day</b> (Ref: Light)    |                                                 |                            |                           |                           |
| Moderate                                  | 1.02 (0.63-1.64)<br>(.95)                       | 0.68 (0.34-1.39)<br>(.30)  | 0.86 (0.41-1.81)<br>(.69) | 0.90 (0.40-1.99)<br>(.79) |
| Heavy                                     | 1.78 (0.78-4.05)<br>(.17)                       | 0.34 (0.04-2.64)<br>(.30)  | 1.39 (0.38-5.07)<br>(.62) | 1.19 (0.25-5.62)<br>(.83) |
| <b>Smoking Frequency</b> (Ref: Non-daily) |                                                 |                            |                           |                           |
| Daily                                     | 0.52 (0.29-0.95)<br>(.03)                       | 1.25 (0.46-3.40)<br>(.67)  | 0.36 (0.16-0.82)<br>(.01) | 4.25 (0.56-32.4)<br>(.16) |
| Pre-quit time                             | 0.97 (0.93-1.01)<br>(.10)                       | 1.00 (0.95-1.06)<br>(.99)  | 1.04 (0.99-1.10)<br>(.14) | 1.02 (0.95-1.08)<br>(.63) |

Multimedia Appendix 4. Associations between user characteristics and response rates and abstinence (complete case analysis), continued

| Characteristic                            | Day 28                             | Day 35                             | Day 42                             | Day 72                             |
|-------------------------------------------|------------------------------------|------------------------------------|------------------------------------|------------------------------------|
|                                           | <i>n</i> = 753                     | <i>n</i> = 753                     | <i>n</i> = 753                     | <i>n</i> = 724                     |
|                                           | aOR (95% CI)<br>( <i>p</i> -value) | aOR (95% CI)<br>( <i>p</i> -value) | aOR (95% CI)<br>( <i>p</i> -value) | aOR (95% CI)<br>( <i>p</i> -value) |
| Age (Winsorized)                          | 0.99 (0.94-1.05)<br>(.80)          | 1.01 (0.95-1.08)<br>(.65)          | 0.99 (0.93-1.06)<br>(.82)          | 1.02 (0.91-1.13)<br>(.78)          |
| <b>Race/Ethnicity</b> (Ref: White)        |                                    |                                    |                                    |                                    |
| Black                                     | 1.74 (0.73-4.12)<br>(.21)          | 0.43 (0.12-1.59)<br>(.21)          | 0.45 (0.12-1.68)<br>(.24)          | 0.21 (0.02-2.03)<br>(.18)          |
| Latina                                    | 0.91 (0.20-4.16)<br>(.91)          | 0.51 (0.07-4.04)<br>(.53)          | 0.60 (0.08-4.78)<br>(.63)          | Undefined                          |
| Multiracial, Asian, AI/AN, NHPI, Other    | 1.14 (0.32-4.06)<br>(.83)          | 0.44 (0.06-3.39)<br>(.43)          | 0.97 (0.21-4.44)<br>(.97)          | 1.09 (0.12-9.68)<br>(.94)          |
| <b>Education</b> (Ref: ≥college degree)   |                                    |                                    |                                    |                                    |
| ≤High school                              | 0.43 (0.13-1.43)<br>(.17)          | 0.56 (0.16-1.99)<br>(.37)          | 0.85 (0.23-3.13)<br>(.81)          | 2.15 (0.18-25.9)<br>(.55)          |
| Some college                              | 1.45 (0.55-3.84)<br>(.45)          | 1.48 (0.50-4.32)<br>(.48)          | 1.53 (0.47-4.97)<br>(.48)          | 4.35 (0.43-44.3)<br>(.21)          |
| <b>Region</b> (ref: South)                |                                    |                                    |                                    |                                    |
| Northeast                                 | 0.79 (0.28-2.22)<br>(.65)          | 0.72 (0.22-2.34)<br>(.59)          | 0.61 (0.17-2.28)<br>(.46)          | Undefined                          |
| Midwest                                   | 0.52 (0.20-1.35)<br>(.18)          | 0.80 (0.33-1.98)<br>(.64)          | 1.01 (0.42-2.43)<br>(.98)          | 0.36 (0.07-1.87)<br>(.23)          |
| West                                      | 0.73 (0.26-2.05)<br>(.54)          | 0.17 (0.02-1.31)<br>(.09)          | 0.17 (0.02-1.33)<br>(.09)          | 0.32 (0.04-2.75)<br>(.30)          |
| <b>Cigarettes per day</b> (Ref: Light)    |                                    |                                    |                                    |                                    |
| Moderate                                  | 0.84 (0.37-1.94)<br>(.69)          | 1.63 (0.69-3.85)<br>(.27)          | 1.36 (0.56-3.32)<br>(.50)          | 0.64 (0.12-3.58)<br>(.61)          |
| Heavy                                     | 1.16 (0.25-5.41)<br>(.85)          | 1.56 (0.32-7.64)<br>(.58)          | 1.42 (0.29-6.90)<br>(.66)          | 1.21 (0.13-11.0)<br>(.87)          |
| <b>Smoking Frequency</b> (Ref: Non-daily) |                                    |                                    |                                    |                                    |
| Daily                                     | 0.66 (0.25-1.74)<br>(.40)          | 0.36 (0.12-1.07)<br>(.06)          | 0.35 (0.12-1.04)<br>(.06)          | 0.17 (0.03-0.82)<br>(.03)          |
| Pre-quit time                             | 1.02 (0.95-1.08)<br>(.63)          | 1.04 (0.97-1.12)<br>(.23)          | 1.06 (0.98-1.13)<br>(.13)          | 1.01 (0.90-1.13)<br>(.89)          |

<sup>a</sup>Response rate *ns* reflect the number of users who had not dropped out of the intervention and had the opportunity to respond (or not) each time smoking status was assessed; On Day 72, in addition to dropouts on quit day through day 42, we users whose quit days were 43-71 days before the end of study and those who opted out on days 43-71 because they did not receive the Day 72 prompt

<sup>b</sup>For abstinence, *n* = 753 reflects total users who made it to quit date. On Day 72, *n* = 724 because 29 users enrolled 43-71 days before the end of the study and did not have the opportunity to respond to the Day 72 smoking status prompt.

<sup>c</sup>Due to quasi-complete separation of data points, aOR was undefined
